# Supplementary material for: A PECTIN METHYLESTERASE gene at the maize Ga1 locus confers male function in unilateral cross-incompatibility
Source: PubMed Central journal article supplement (PMC6131150; doi:10.1038/s41467-018-06139-8), 2018-09-10
Supplement: 41467_2018_6139_MOESM1_ESM.pdf [file 41467_2018_6139_MOESM1_ESM.pdf]

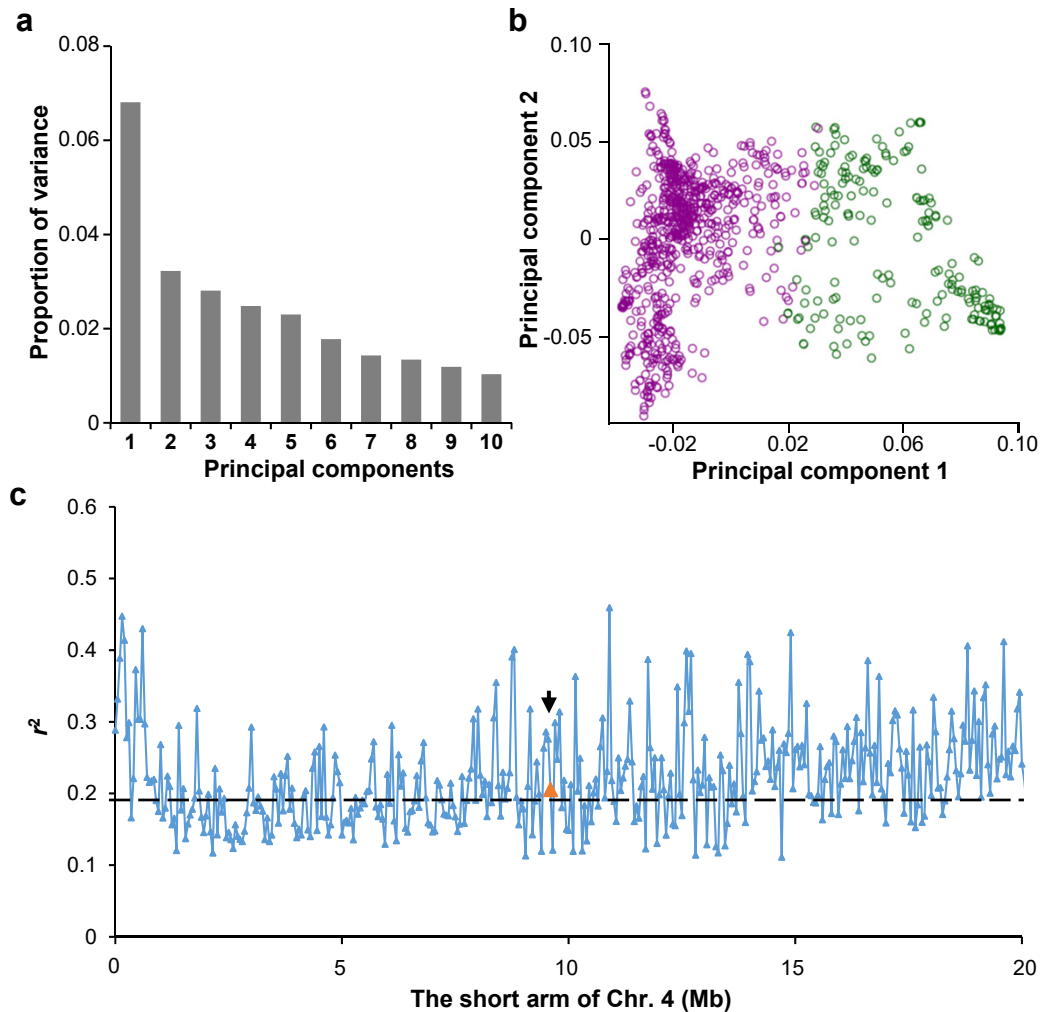

**Supplementary Figure 1** Population structure analysis. **(a)** Top-10 principal components explained variations observed in the association panel. **(b)** Principal component plot, to show that principal component 1 explained the genomic variation between the inbred lines from temperate (purple) and tropic (green) regions. **(c)** Linkage disequilibrium plot of the first 20 Mb in Chromosome 4 with sliding windows of 50 kb, showing that the pollen determinant (indicated by a brown dot and a black arrow) is located in a LD region less than 200 Kb.

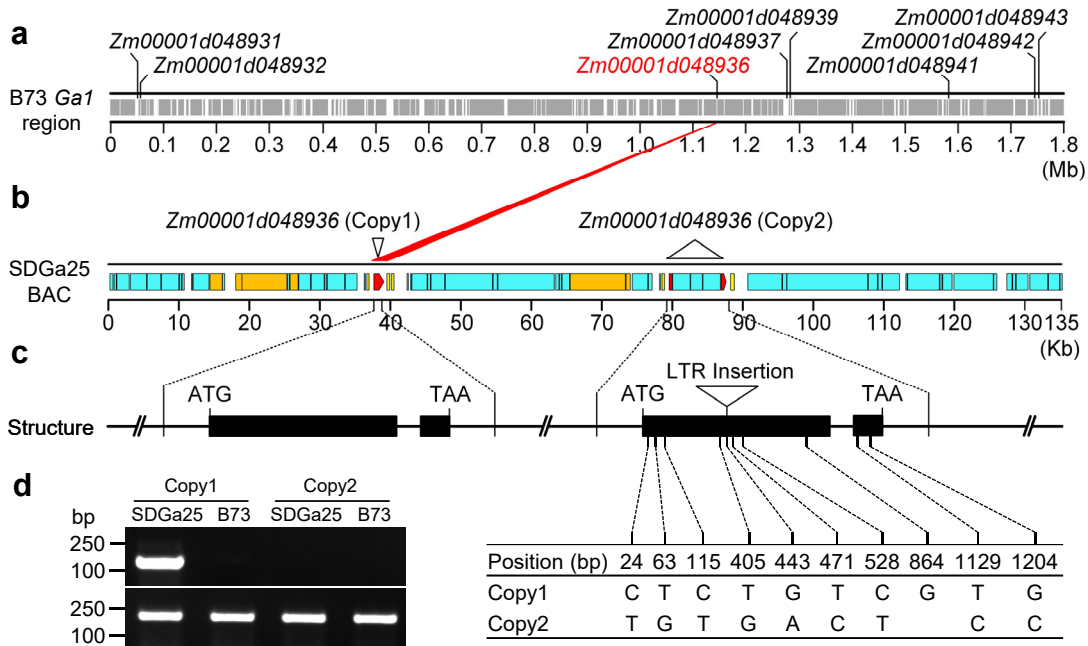

**Supplementary Figure 2** Analysis of the BAC clone harboring *Zm00001d048936* of *Ga1-S*. **(a)** Mapping region of the pollen determinant. The gray boxes indicate the locations of transposons and retrotransposons. The candidate gene is indicated by red letters. **(b)** Annotation of the BAC sequence. Red arrows represent two copies of *Zm00001d048936*. LTR/Gypsy is indicated by light-blue boxes. LTR/Copia is indicated by light-yellow boxes. DNA/CMC-EnSpm is indicated by gray boxes. **(c)** Gene structure and polymorphic sites of two copies of *Zm00001d048936*. Exons and introns are indicated as black rectangle bars and lines, respectively. Polymorphic sites are positioned relative to the start codon. **(d)** RT-PCR to examine the expression of two copies of *Zm00001d048936* in SDGa25 (*Ga1-S*) and B73 (*ga1*) pollen. *ZmGAPDH* was used as an internal control (bottom panel).

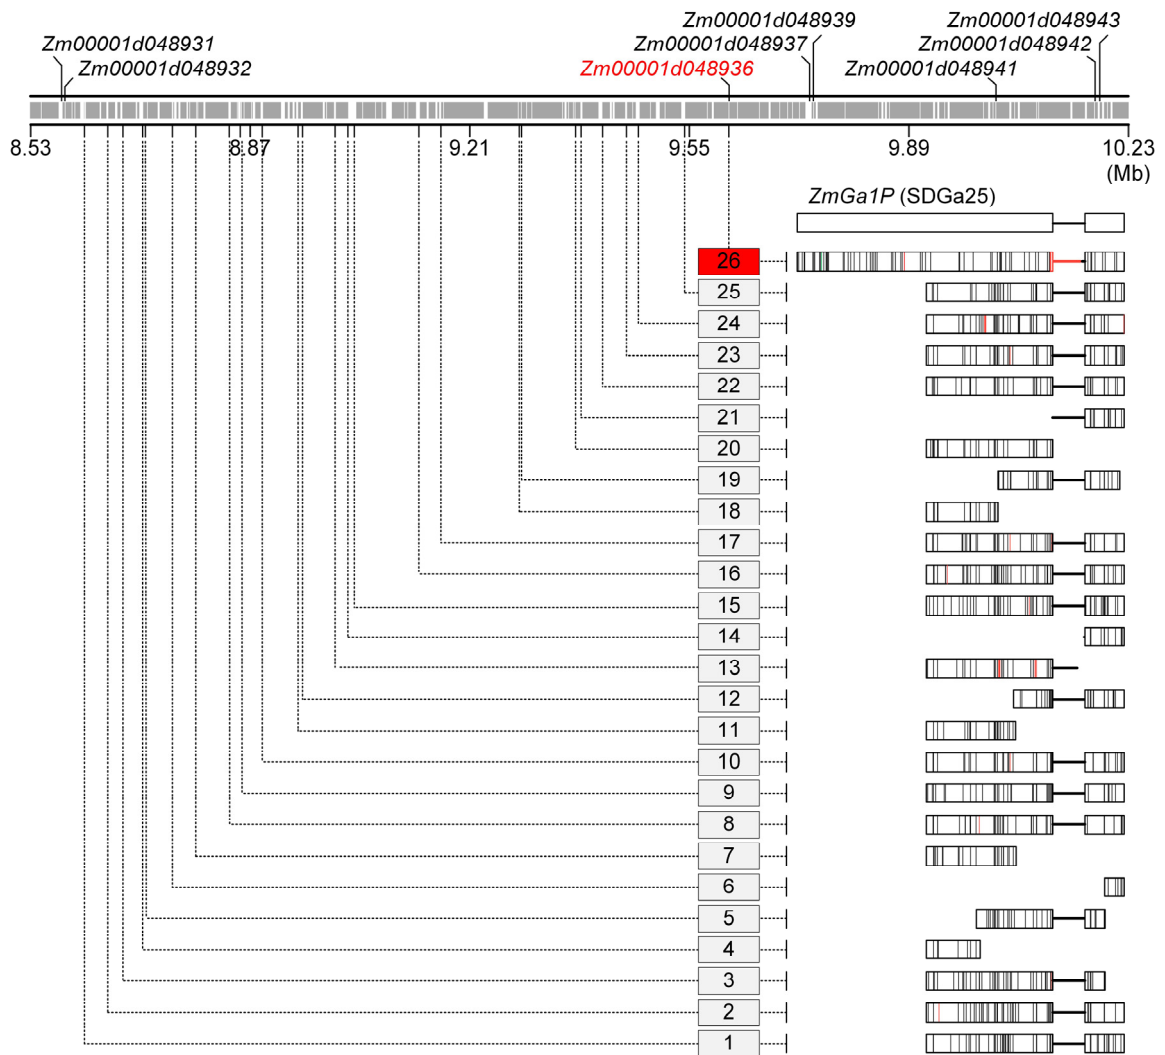

**Supplementary Figure 3** Gene structure of *ZmGa1P* copies in the mapping region of B73. The red box indicates full-length *Zm00001d048936/ZmGa1P* in B73. The gray boxes indicate partial PME fragments. The black and red lines in the gene structures represent the SNPs and InDels compared with SDGa25.

```

SDGa25 ATGATGATGAGTAAACAATGCTCGTCTTGCCCTGCTCCTAGTGTTGTTGAGCTTGGATCTCTGCCGACGACATCGTGCAAAAAG--- 87
B73 ATGTGATGAGTAAACACATGCTCATATTGTCCTGCTCCTAGTGTTGTTGAGCTTGTATCGCTACCGACGACATCGTGCAATAGGGTC 90
*** ***** * ***** *

SDGa25 GTCTTTTCAACTTATGGGTGACAAACCAGCCAGCTAATGCCACCAAGATGCGGGGTGTGCTAAGAAAGATGATGCGCTCTCTCCGCC 177
B73 GTCTTTTCAACTCATGGGTGAGACACCAACCAGCTAATGCCACCAAGATGCGGGGTGTGCTAAGAAAGATGATGCGCTCTCTCTGCC 180
*** ***** * ***** *

SDGa25 GACACCATTAAAGGTATGGAATTACATCGACCTGCCTCTCAATTGAGACCTGAAGATGGCGGTTACACGACCATTAGCGAGTCCATCGCC 267
B73 AACACCATTAAAGTAAGGAATTACATTGACCTGCCTCCGAATTGAGACCTGAAGATGGTGGTTACACGACCATTAGCGAGTCCATTGCC 270
***** * ***** *

SDGa25 AACATCCCTGAGGACAACGCCAAACGCTACCTCCTTATCCTCAAACCTGGTGTGTTGTTCCGCGAGAAGCTGTTACTCGGTAGAAGCAAG 357
B73 AACATCCCTGAGGACAACCCAATGCTACGTCCTACCCTCAAACCTGGTGTGTTGTTCCGCGAGAAGCTGTTACTCGGTAGAAGCAAG 360
***** * ***** *

SDGa25 CCTTTCATCACCATAATGTCCGAGGACCCCATGAACCTGCTGTATCGTCTGGAATGACACTGCCACCACCATGGGCAAGGACGGCAAG 447
B73 CCATTCCTCACCATAATATCCGAGGACCCCATGAACCCAGCTATTATCGTCTAGAATGACACTGCCACCACCATGGGCAAGGACGGCAAG 450
** ** ***** * ***** *

SDGa25 CCCCTTGGTGTGGATGGAAGCAGTACCATGGCCATAGAGTCCGACTATTTTGTGCGCTACAACGTTGCTTCAAGAACGACGCGCCGCTA 537
B73 CCCCTTGGTGTGGATGGAAGCAGCACCATGGCGATAGAGTCAAACCTATTTTGTGCGCTACAACATTGCTTCAAGAACGACGCGCCGCTA 540
***** * ***** *

SDGa25 CCAAAGCTAGGGGAAAAGAAAGGTGAGGCACCAAGCAGCTGCGAGTGATGGGAACAAGGCAACCTTCTACAATTGACCATCGAAGGCGGC 627
B73 CCAAAGCTAGGGGAAAAGAAAGGTGAGGCACCAAGCAGCTGCGAGTGATGGGAACAAGGCAACCTTCTACAATTGACCATCAATGCGGC 630
***** * ***** *

SDGa25 CAGGGTGCTCTGTACGACCAGCGGGTCTGCACTACTTCAAGGCTTGTGCCATCAAGGGAACCATCGACTTCTCTCGGATCTGCCAAG 717
B73 CAGGGTGCTCTAAACGACCAGCGGGTCTGCACTACTTCAAGGCTTGTGCCATCAAGGGAACCATCGACTTCTCTCGGATCTGCCAAG 720
***** * ***** *

SDGa25 TCATTTTATGAGGAATGCAAAATCGTTTCGGTGTGAAGGAGGCATTGGTATTGCCATTGGCACCACCGGAGCAGGACCGCTCTAGAAAT 807
B73 TCATTTTATGAGGAATGCAAAATGTTTGGTGTGAAGGAGGCATTGACATTGCCAATCGTCCACCAGGAGCAGGACCGGTCTAGAAAT 810
***** * ***** *

SDGa25 CCCATCGAAATCGCCCCAGGCAAGAGCGGGTGGCATTCAAGACTTGCAACAATCGAGGGGGAAGGAGAAAAAATTTACTTGGGTAGGGTG 897
B73 CCCATCAAAATGCCCCAGGCAAGAGCGGGTGGCATTCAAGACTTGCAACAATCGAGGGGGAAGGAGAAAAAATTTACTTGGGTAGGGTG 900
***** * ***** *

SDGa25 GGCACGCCTGTGATATACTCCTACCTAATATAGGTAAGGAGATTGTAGGCATAATATCTGATGGTGGGACGTCAGACAGTCGAAAGG 987
B73 GGCACGCCTGTGATCTACTCCTACCCGATATAGGTAAGGAGATTGTAGGCATAATATCTAATGGTTACGACGT----- 974
***** * ***** *

SDGa25 TACCACTCCTATGTCCATTACATCCTCTCTTTCTTCATATATGATTGTGTGATTAAGGTGTTGTTTCATTATCTATACTGATGAAAGGT 1077
B73 -----TGATACTAAGAAAGG- 991
* ***** *

SDGa25 GTTGTGTTGCGTTGCATT-TTTTATTATAGGGGTACTIONTACTGCGCCACTTTTAGGTGTTACGGGCTGGGATGTCTCCAATGGTAACCT 1166
B73 --TGTTGTTGCGTTGCATTCTTTTTATAGGGGTACTIONTACTGCGCCACTTTCAAGTGTACGGGCTAGGATGTCTCCAATGGTAACCT 1079
***** * ***** *

SDGa25 CAACTCTGACCTATGTGAGGCAATACCTTTCTCGGGATACACTACATCTCGGGGAGTCATGGATCCCGTCCCTACCACCCGCTGAAG 1256
B73 CAACTCAACCTATGTCCAGGCAATACCTTTCTCGGGATACACTACATCTCGGGGAGTCATGGATCCCGTCCCTACCACCCGCTGAAG 1169
***** * ***** *

SDGa25 AATAA 1261
B73 AATAA 1174
*****

```

**Supplementary Figure 4** Alignment of the *ZmGa1P* genomic sequence between SDGa25 and B73. The two exons in SDGa25 (*Ga1-S*) are highlighted in gray. \* indicates the identical nucleotides.

```

SDGa25 MMSKQMLVLSLLLVLFEGLSPTTSCKK-VFFNLWVTNQPANATQDAGCAKKDDALSSADTIKVVNYIDPASQLRPEDGGYTTISESIA 89
B73    MVMSKHMLILSLLLVLFEVLSPTTSCNRVVSFNSWVRHQPANATQDAGCAKKDDALSSANTIKVRNYIDPASELRPEDGGYTTISESIA 90
      * . *** ** * ***** * ***** * ** * * ***** ***** ***** *****

SDGa25 NIPEDNAKRYLLILKPGVVFREKLLLRGSKPFIITIMSEDPMPNPAVIVWNTATTMGKDGKPLGVDGSSTMAIESDYFVAYNVVFKNDAPL 179
B73    NIPDDNTKCYVLLKPGVVFREKLLLRGSKPFLTIISEDPMNPAAIIV----- 137
      *** ** * * * ***** ** ***** **

SDGa25 PKLGEKKGEAPALRVMGKATFYNCTIEGGQGALYDQTLGHYFKACAIAKGTIDFIFGSAKSFYEECKIVSVLKEALVPLAPPEQDRSRN 269
B73    ----- 137

SDGa25 PIEIAPGKSGLAFKCTIEGEGEKIYLRVGTTPVIYSYTNIGKEIVGIISDGRDVQTVERGYCATFRCYGPGMSPMVTSTLTVEAIPF 359
B73    ----- 137

SDGa25 LGIHYSISGESWIPSLPPAEE 379
B73    ----- 137

```

**Supplementary Figure 5** Alignment of ZmGa1P protein sequence between SDGa25 and B73. The underlined amino acid sequence is used to generate the antibody. \* indicates the identical amino acids.

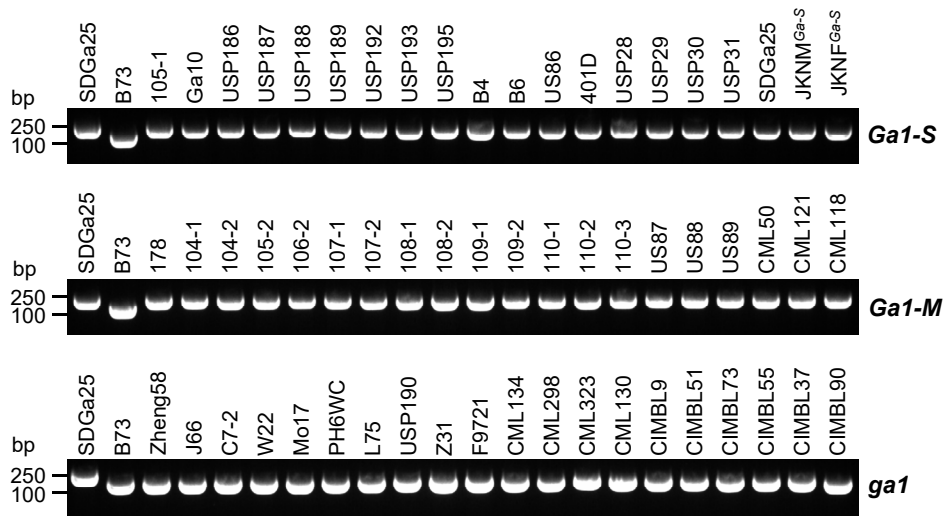

**Supplementary Figure 6** Genotyping *ZmGa1P* in *Ga1-S*, *Ga1-M*, and *ga1* lines. A total of 946 inbred lines were genotyped, including 20 *Ga1-S* lines, 54 *Ga1-M* lines and 872 *ga1* lines, using a marker (*ZmGa1P-Del*) that showed the 88-bp deletion in *ga1* plants. Genotypes of 20 representative lines of *Ga1-S* (upper panel), *Ga1-M* (middle panel), and *ga1* (lower panel) are shown.

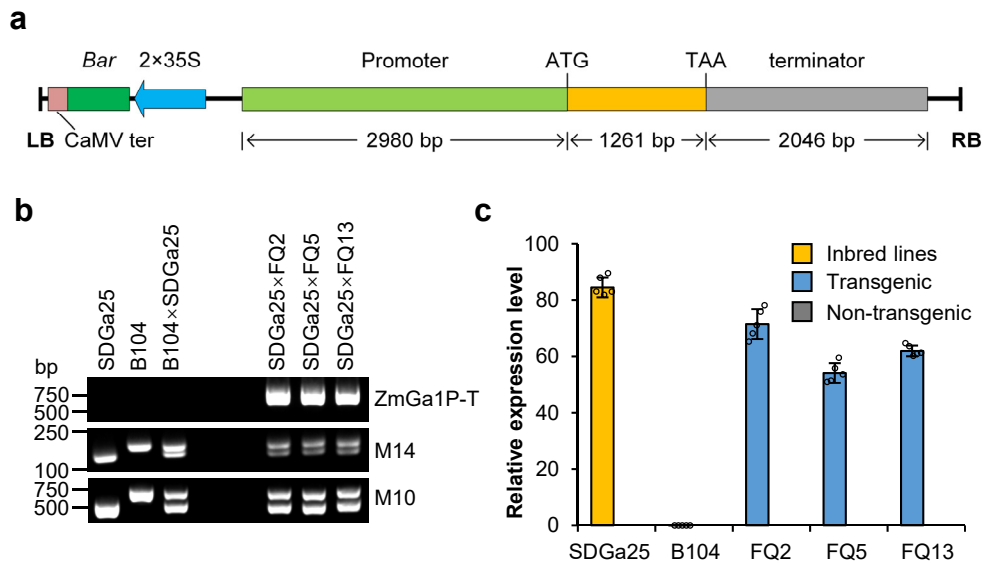

**Supplementary Figure 7** Validation of *ZmGa1P* by expressing its genomic fragment. (a) The construct containing *Zm00001d048936/ZmGa1P* genomic fragment cloned from SDGa25 (*Ga1-S*). LB, left border; RB, right border; CaMV ter, cauliflower mosaic virus polyadenylation signal; *Bar*, Basta-resistance gene. (b) Genotyping the seeds of parents and indicated cross-pollination. Marker *ZmGa1P-T* was used to confirm the transgenes; M14 and M10 markers were used to check heterozygosity. (c) Quantitative analysis of *Ga1-S* type *Zm0001d048936/ZmGa1P* transcripts in pollen of the indicated plants. FQ2, FQ5, and FQ13 represent transgenic plants that expressed *Zm0001d048936/ZmGa1P* (genomic gene) in B104 (*ga1*). Error bars represent the means  $\pm$  SD ( $n = 5$ ).

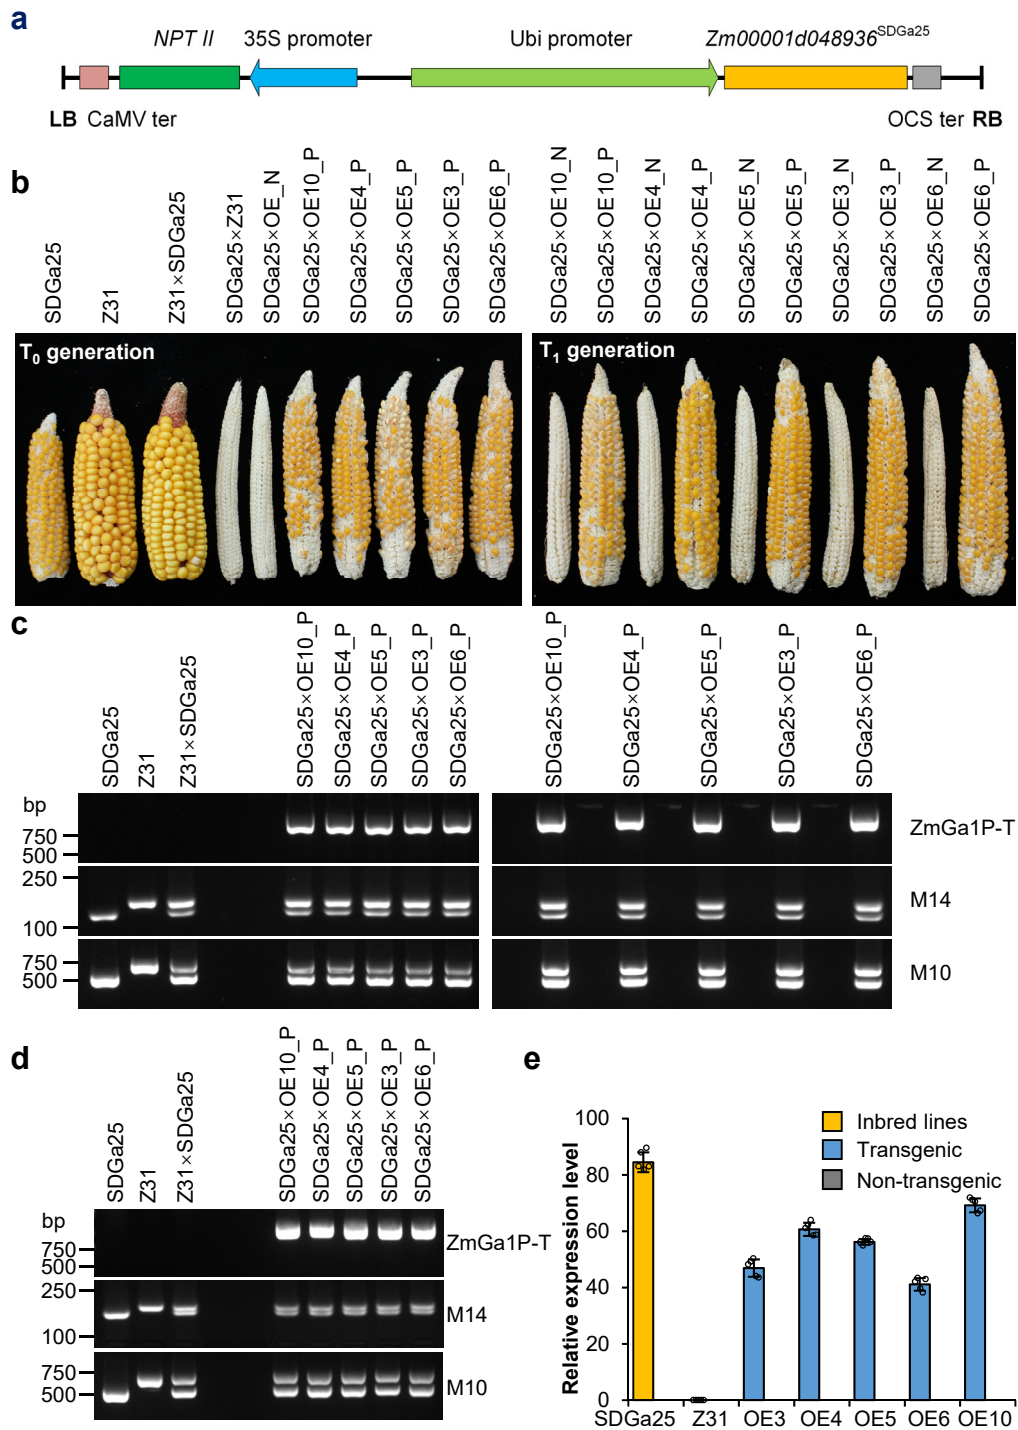

**Supplementary Figure 8** Validation of *ZmGa1P* by overexpression. (a) The construct for overexpressing *Ga1-S* type *Zm0001d048936/ZmGa1P*. LB, left border; RB, right border; Ubi, ubiquitin; 35S, cauliflower mosaic virus 35S promoter; OCS ter, octopine synthase gene terminator; CaMV ter, cauliflower mosaic virus polyadenylation signal; *NPT II*, neomycin phosphotransferase II resistance gene. (b) Cross-compatibility analysis, to show the ears of SDGa25 (*Ga1-S*) pollinated by Z31 (*ga1*) and the transgenic plants (OE\_P) at T<sub>0</sub> (left) and at T<sub>1</sub> generation (right). The corresponding nontransgenic plants (OE\_N) were used as negative controls. (c and d) Genotyping the seeds of parents and indicated cross-pollinations by using pollen from T<sub>0</sub> and T<sub>1</sub> plants (c) and from T<sub>2</sub> plants (d). Marker *ZmGa1P-T* was used to confirm the transgenes; M14 and M10 markers were used to check heterozygosity. (e) Quantitative analysis of *Zm0001d048936/ZmGa1P* transcripts in pollen of the OE transgenic plants in Z31 background. Error bars represent the means  $\pm$  SD ( $n = 5$ ).



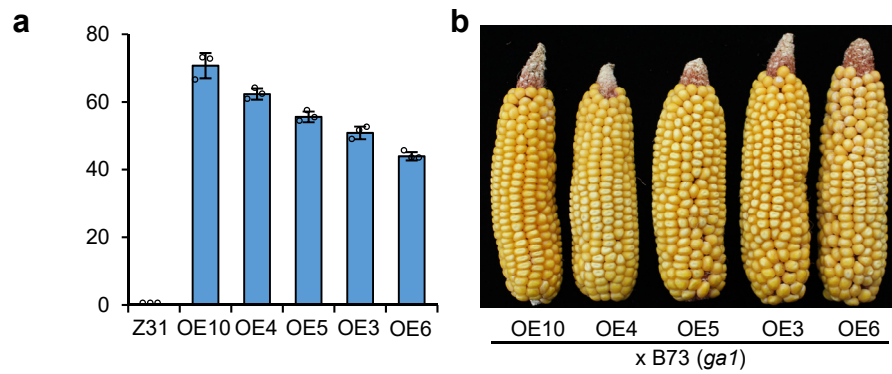

**Supplementary Figure 9** Examination of the female function of *ZmGa1P*.  
**(a)** The relative expression levels of *ZmGa1P* in the silks of five homozygous T<sub>2</sub> transgenic lines (OE10, OE4, OE5, OE3 and OE6) normalized with *ZmGAPDH*. Error bars represent the mean  $\pm$  SD ( $n = 3$ ).  
**(b)** The ears of five *ZmGa1P* OE homozygous T<sub>2</sub> lines (OE10, OE4, OE5, OE3 and OE6) pollinated by B73 (*ga1*) pollen, showing full seed-set.

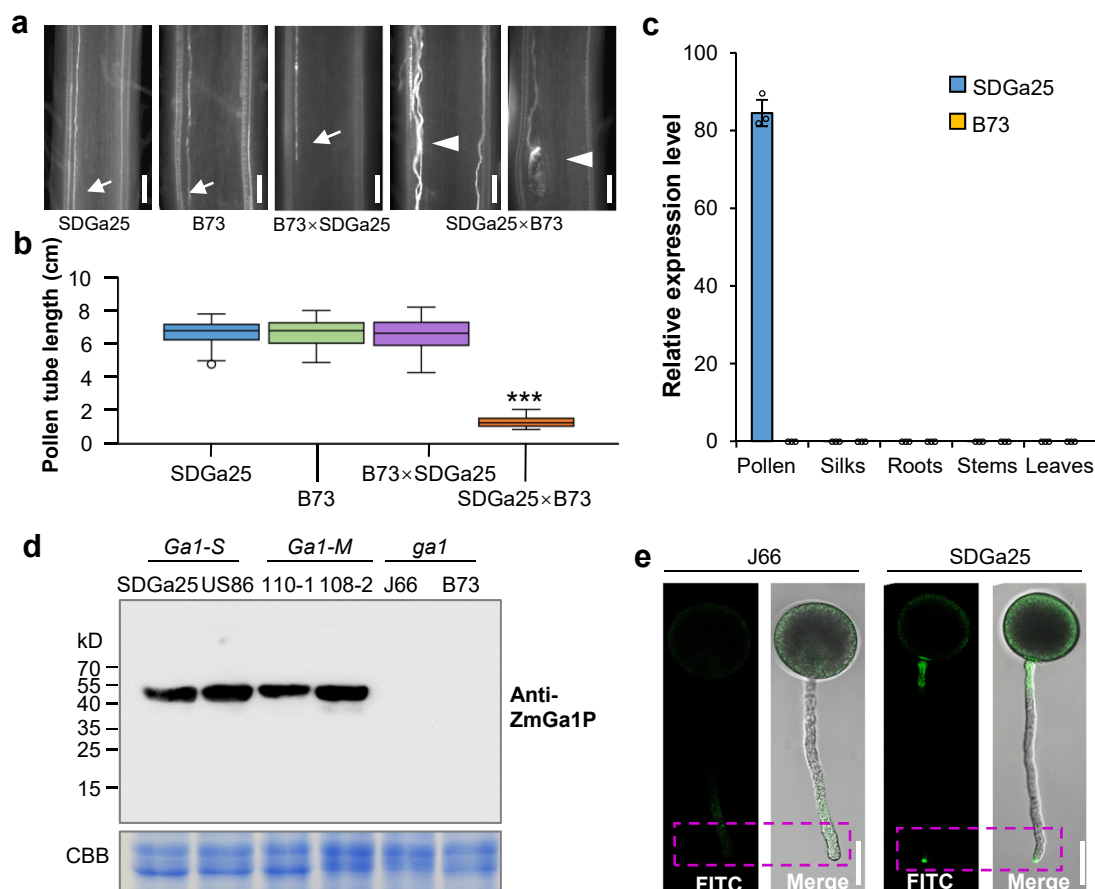

**Supplementary Figure 10** *ZmGa1P* is specifically expressed and functions in the pollen tubes. **(a)** Comparison of the *in vivo* pollen tube growth between compatible (SDGa25 selfing, B73 selfing, and B73 x SDGa25) and incompatible (SDGa25 x B73) pollinations. Scale bar = 10  $\mu$ m. Arrows point to normal pollen tubes and arrowheads indicate short pollen tubes and a clavate pollen tip. **(b)** Box plot of the pollen tube length in the indicated crosses examined in **(a)**. Error bars represent the mean  $\pm$  SD ( $n = 24$ ). \*\*\* $P < 0.001$  as determined by Student's *t*-test with Welch's correction (two tailed). **(c)** Spatial and quantitative analysis of *ZmGa1P* expression in SDGa25 (*Ga1-S*) and B73 (*ga1*) normalized with *ZmGAPDH*. Error bars represent the mean  $\pm$  SD ( $n = 3$ ). **(d)** Western blotting of secretory proteins from pollen of SDGa25, US86, 110-1, 108-2, J66, and B73 using the anti-ZmGa1P antibody. The amount of protein loaded in each lane was determined by Coomassie brilliant blue staining (CBB). **(e)** Immuno-staining the J66 and SDGa25 pollen tubes using anti-ZmGa1P antibody. The parts circled by magenta dashed lines were enlarged in Fig. 3a. Scale bar = 10  $\mu$ m. FITC, Fluorescein isothiocyanate.

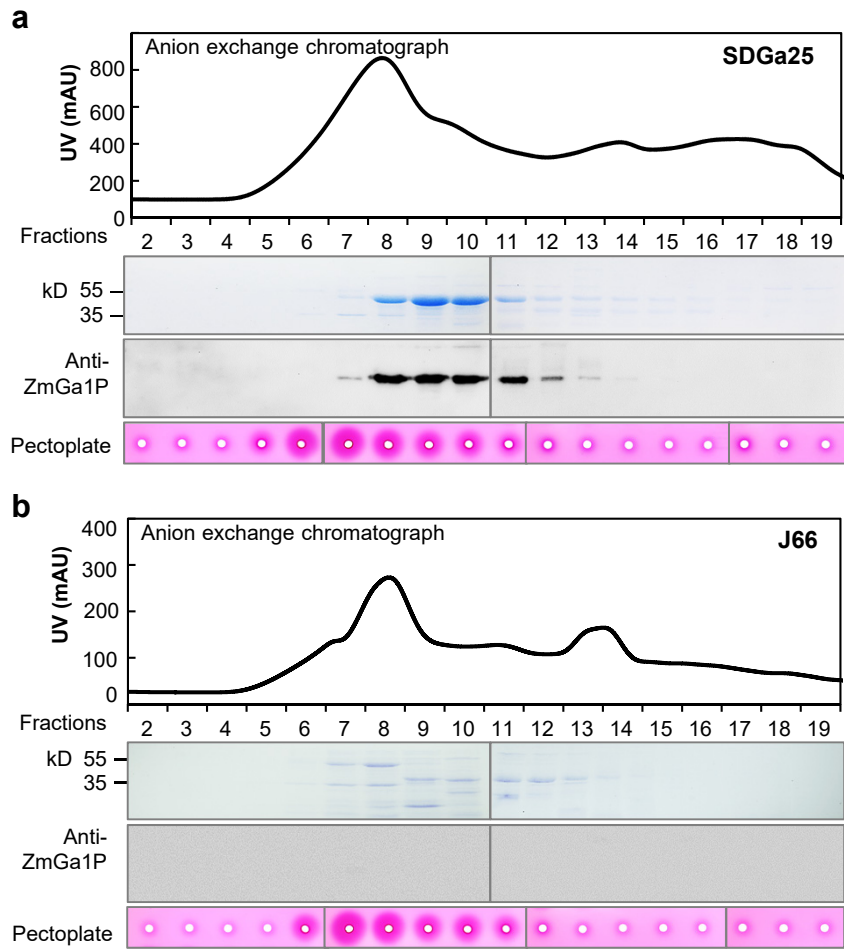

**Supplementary Figure 11** Fractionation and pectplate assay of pollen secretory proteins. (**a** and **b**) Fractionation of the total proteins secreted by germinated pollen using successive anion exchange. Equal amount of secretory proteins of fractions 2-19 from SDGa25 (*Ga1-S*, **a**) and J66 (*ga1*, **b**) were separated on SDS-PAGE gel (upper panel) and probed with anti-ZmGa1P antibody (middle panel). Pectoplate assay to show methylesterase activities in the above fractions (bottom panel).

1 MMMSKQMLVL SLLLVL FELG SLPTTSCKKV FFNLWVTNQP ANATQDAGCA  
51 **KKDDALSSAD TIKVWNYIDP ASQLRPEDGG YTTISESIAN IPEDNAKRYL**  
101 **LILKPGVVFR** EKLLLGRSKP FITIMSEDPM NPAVIVWNDT ATTMGK**DGKP**  
151 **LGVDGSSTMA IESDYFVAYN VVFKNDAPLP** KLGEKKGEAP **ALRVMGTKAT**  
201 FYNCTIEGGQ GALYDQTGLH YFKACA**IKGT** **IDFIFGSAKS FYEECKIVSV**  
251 **LKEALVLPLA PPEQDRSRNP IEIAPGKSGL AFKTCTIEGE** **GEKIYLGRVG**  
301 **TPVIYSYJNI GKEIVGIISD GRDVQTVERG** **YYCATFRCYG** PGMSPMVTST  
351 LTYVEAIPFL GIHYISGESW IPSLPPAEE

**Supplementary Figure 12** LC-MS/MS analysis of ZmGa1P in pollen secretome. The detected peptides are highlighted by red letters.

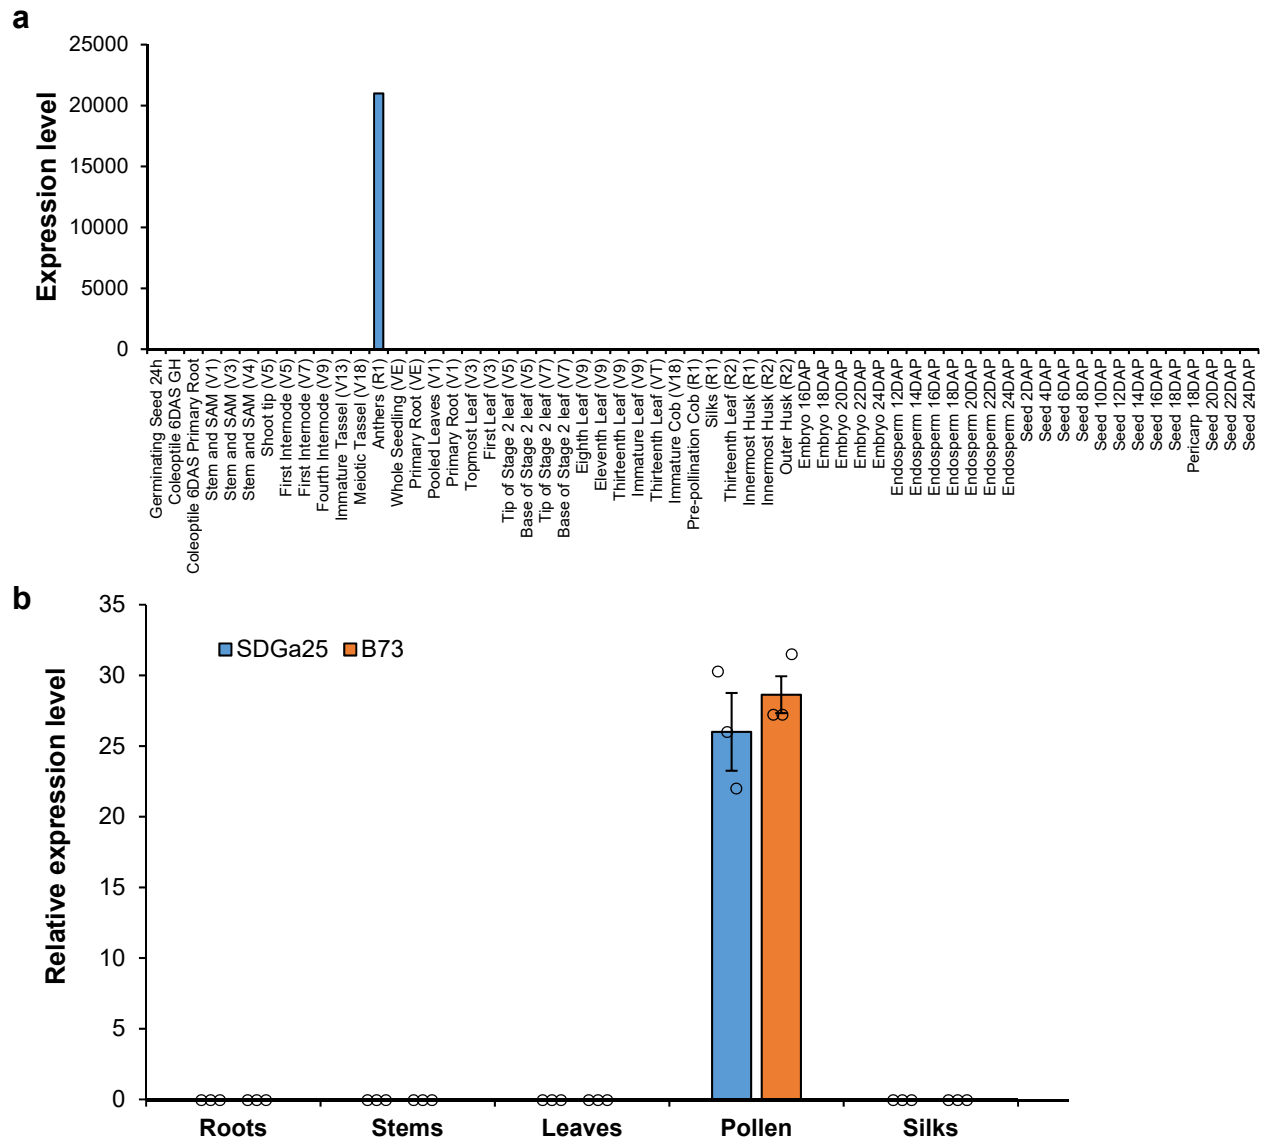

**Supplementary Figure 13** *ZmPME10-1* is specifically expressed in pollen. (a) Online public RNAseq data<sup>48</sup>, showing that *ZmPME10-1* is specially expressed in anthers. (b) qPCR to examine *ZmPME10-1* expression in the SDGa25 (*Ga1-S*) and B73 (*ga1*) tissues. *ZmGAPDH* was used an internal control. Error bars represent the mean  $\pm$  SD ( $n = 3$ ).

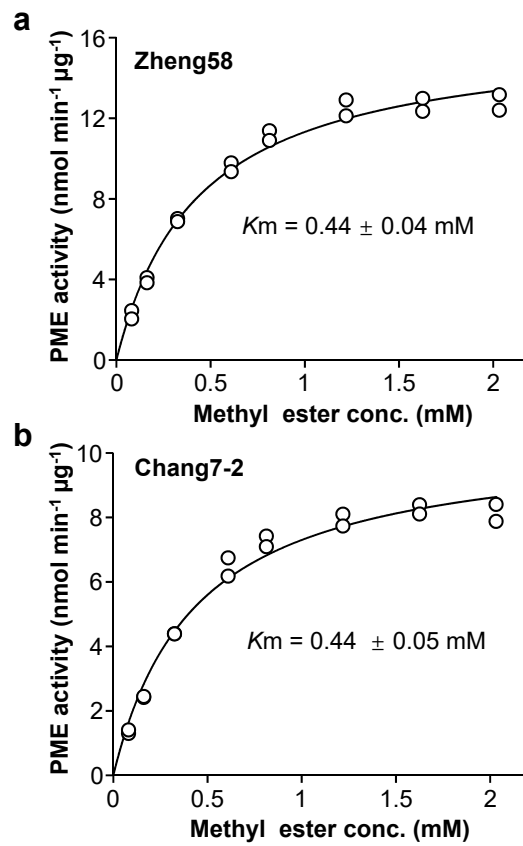

**Supplementary Figure 14** Kinetic analysis of PME activity of pollen secretory proteins. **(a and b)** Kinetic analysis of PME activity of secretory proteins in fraction 8 of Zheng58 (*ga1*) and Chang7-2 (*ga1*), respectively. The data represent the mean  $\pm$  SD of three replicates.

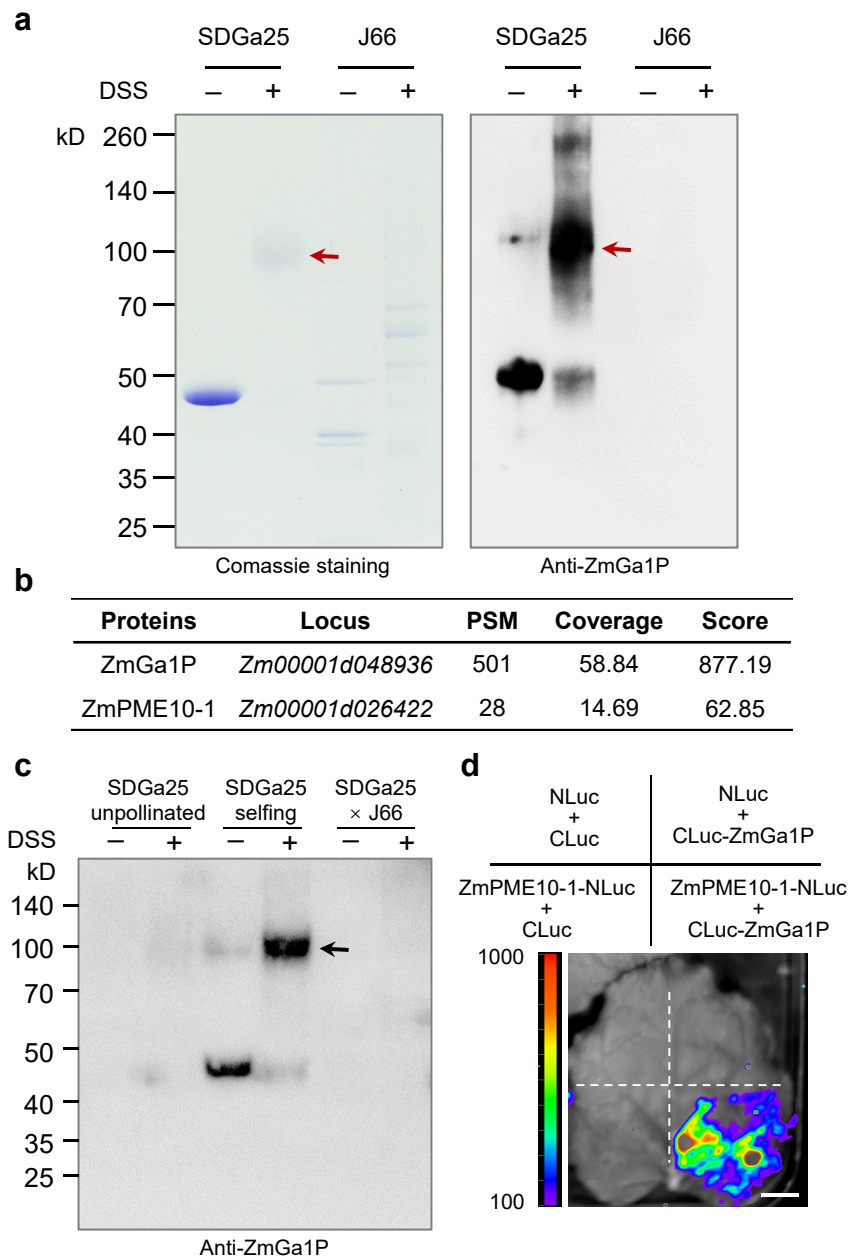

**Supplementary Figure 15** ZmGa1P and ZmPME10-1 interact to form a protein complex. **(a)** Western blotting of the pollen secretory proteins crosslinked (+) and not crosslinked (-) by DSS. The left panel is the CBB staining gel containing pollen secretory proteins of SDGa25 (*Ga1-S*) and J66 (*ga1*). The right panel shows the loaded secretory proteins probed by anti-ZmGa1P antibody. The red arrows indicate the 100-kD band. **(b)** LC-MS/MS analysis of the indicated ~100-kD band, identifying ZmGa1P and ZmPME10-1. **(c)** Western blotting of the DSS crosslinked (+) and not crosslinked (-) total proteins extracted from the unpollinated and pollinated silks of SDGa25 using anti-ZmGa1P antibody. The black arrow indicates the ZmGa1P signals at 100-kD position. **(d)** Split-luciferase complementation assay to show the interaction between signal peptide-depleted ZmGa1P and ZmPME10-1 in *N. benthamiana* leaves infiltrated with the construct combinations shown above. Scale bar = 1 cm.

**Fig. 2b**

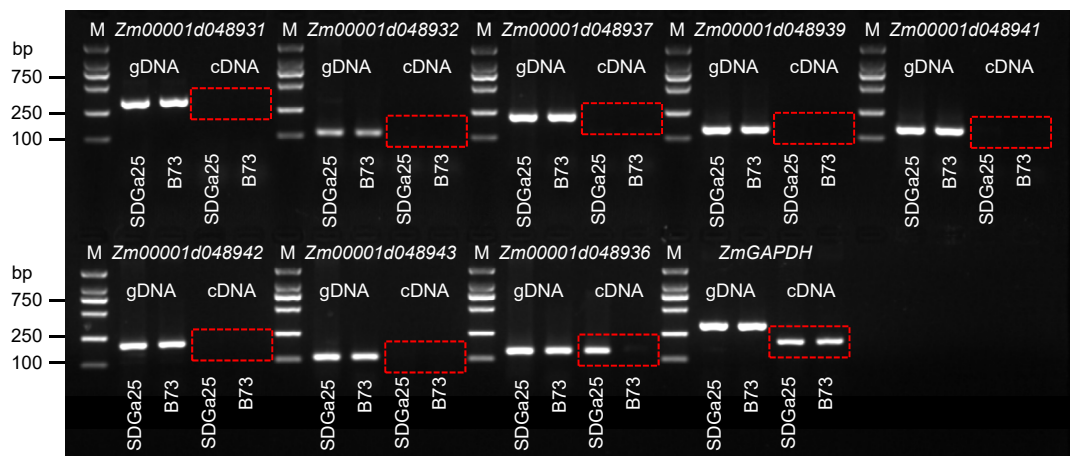

**Supplementary Figure 16** Uncropped images of gels shown in Fig. 2.



Supplementary Fig. 2d

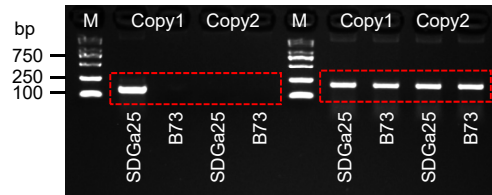

Supplementary Fig. 6

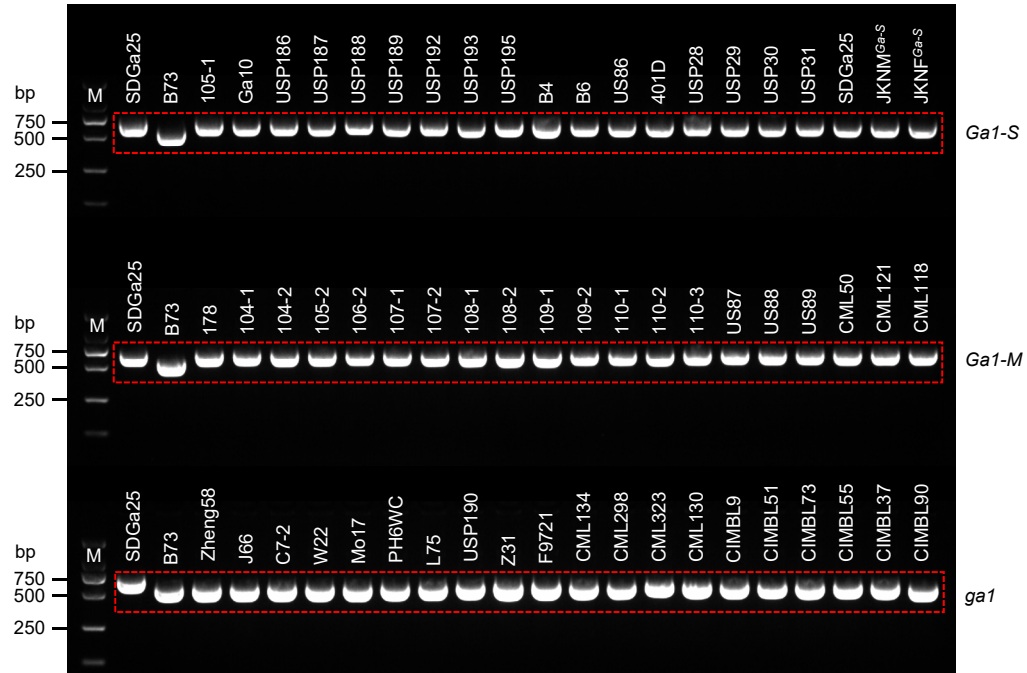

Supplementary Fig. 7b

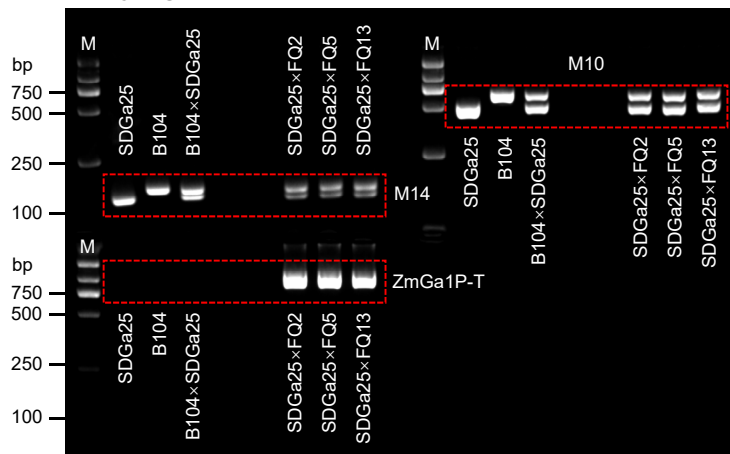

Supplementary Figure 17 Uncropped images of gels shown in Supplementary Fig. 2, 6 and 7.

Supplementary Fig. 8c

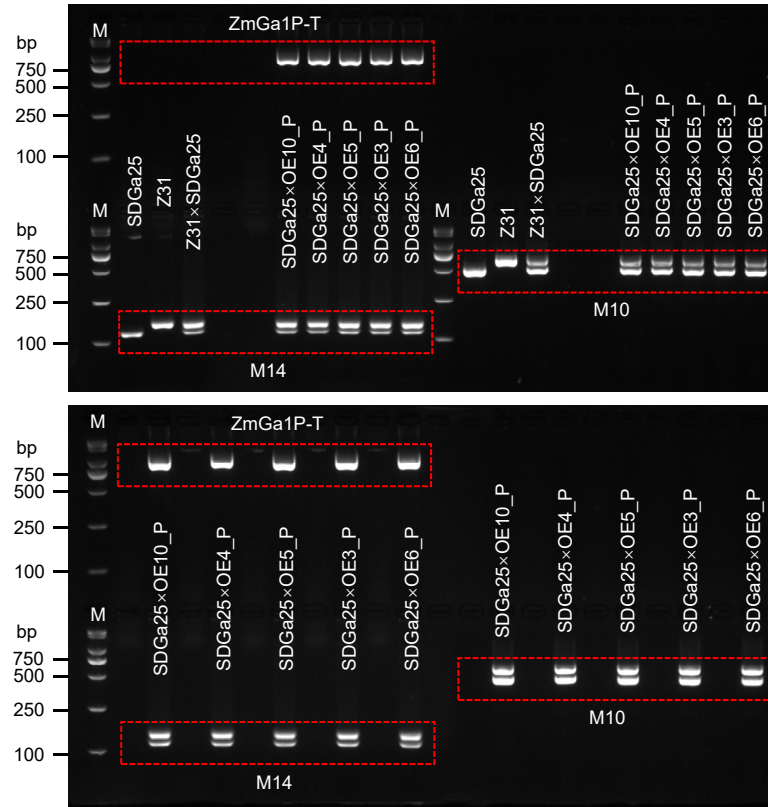

Supplementary Fig. 8d

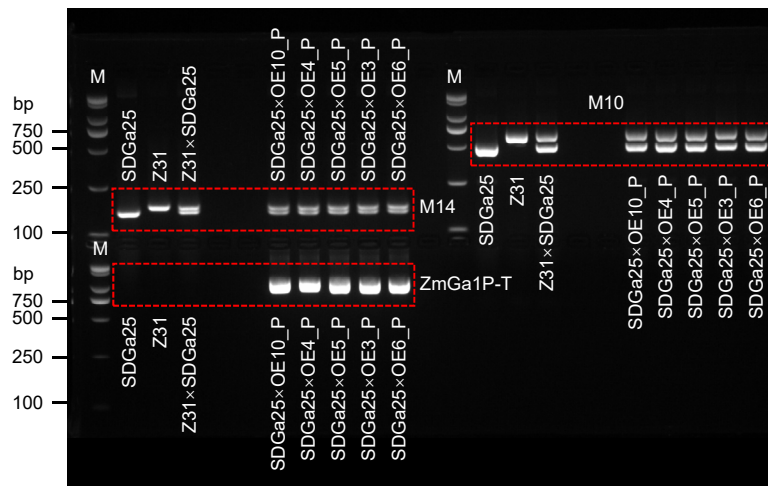

Supplementary Figure 18 Uncropped images of gels shown in Supplementary Fig. 8.

**Supplementary Fig. 10d**

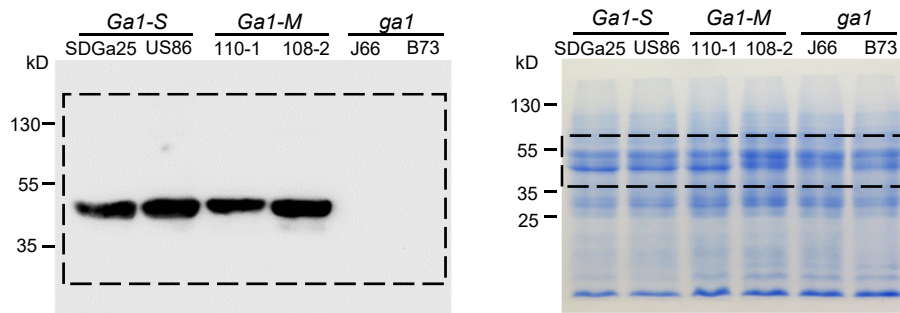

**Supplementary Figure 19** Uncropped images of blots and gels shown in Supplementary Fig. 10.

**Supplementary Fig. 11a**

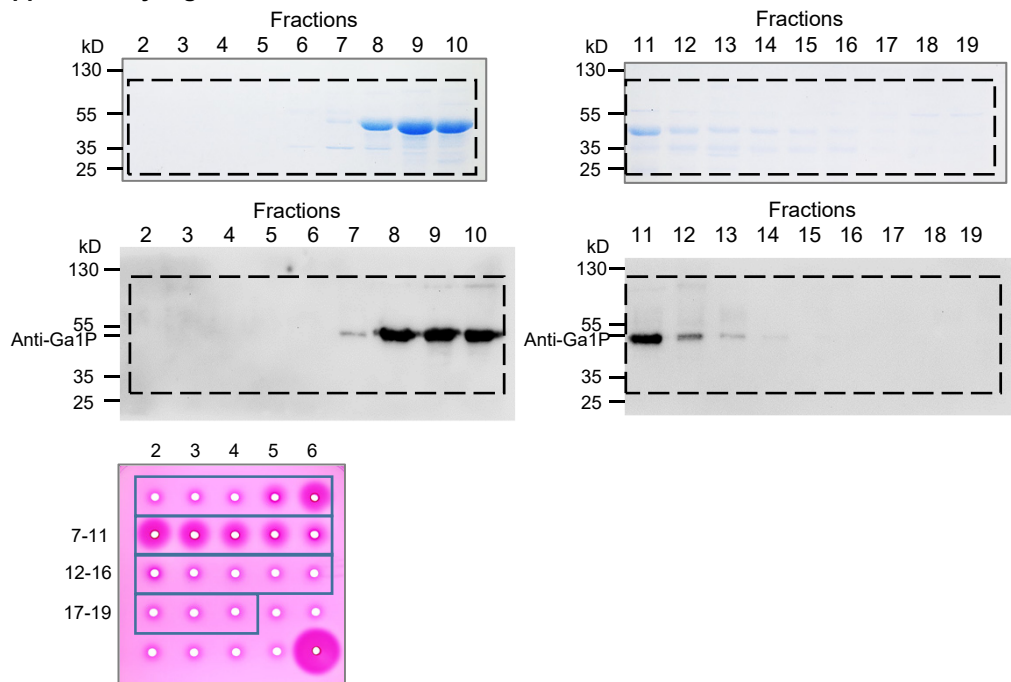

**Supplementary Fig. 11b**

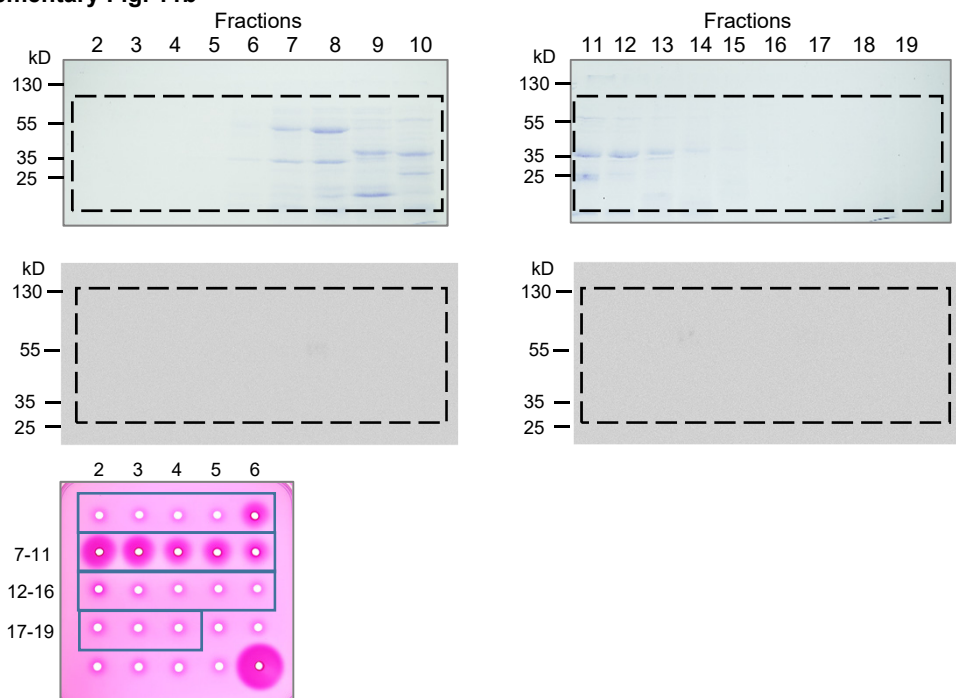

**Supplementary Figure 20** Uncropped images of blots and gels shown in Supplementary Fig. 11.

**Supplementary Fig. 15a**

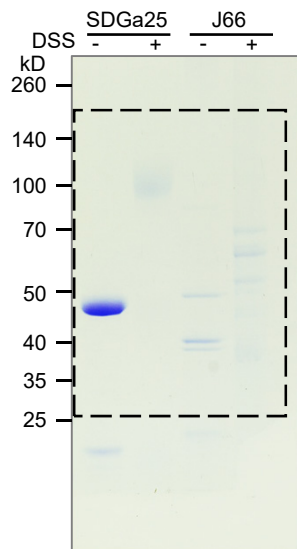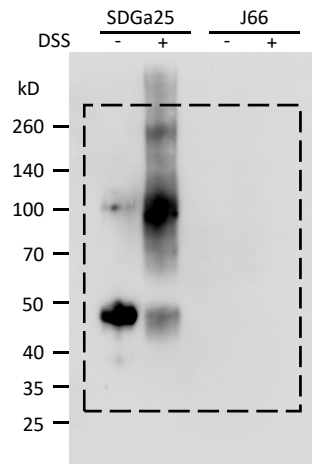

**Supplementary Fig. 15c**

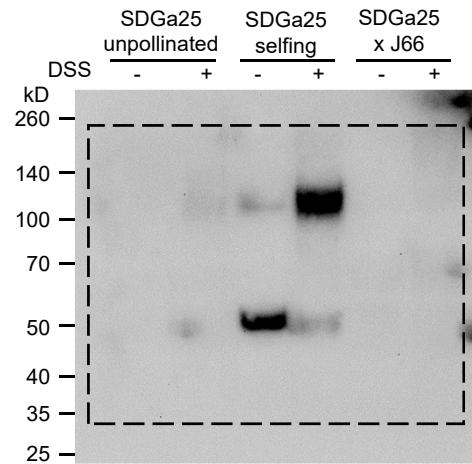

**Supplementary Figure 21** Uncropped images of blots and gels shown in Supplementary Fig. 15.

**Supplementary Table 1** Genotype and cross-compatibility of the recombinants in the mapping region

| Source | Phenotype | No. of recombinants | Marker |     |     |     |     |     |    |    |     |     |     |     |
|--------|-----------|---------------------|--------|-----|-----|-----|-----|-----|----|----|-----|-----|-----|-----|
|        |           |                     | M14    | M13 | M33 | M44 | M53 | M61 | M1 | M4 | M16 | M89 | M10 | M11 |
| HP     | C         | 61                  | Pp     | PP  | PP  | PP  | PP  | PP  | PP | PP | PP  | PP  | PP  | PP  |
| SP     | CI        | 17                  | Pp     | pp  | pp  | pp  | pp  | pp  | pp | pp | pp  | pp  | pp  | pp  |
| SP     | C         | 14                  | pp     | Pp  | Pp  | Pp  | Pp  | Pp  | Pp | Pp | Pp  | Pp  | Pp  | Pp  |
| HP     | C         | 43                  | Pp     | Pp  | PP  | PP  | PP  | PP  | PP | PP | PP  | PP  | PP  | PP  |
| SP     | CI        | 12                  | Pp     | Pp  | pp  | pp  | pp  | pp  | pp | pp | pp  | pp  | pp  | pp  |
| SP     | C         | 10                  | pp     | pp  | Pp  | Pp  | Pp  | Pp  | Pp | Pp | Pp  | Pp  | Pp  | Pp  |
| HP     | C         | 21                  | Pp     | Pp  | Pp  | PP  | PP  | PP  | PP | PP | PP  | PP  | PP  | PP  |
| SP     | CI        | 7                   | Pp     | Pp  | Pp  | pp  | pp  | pp  | pp | pp | pp  | pp  | pp  | pp  |
| SP     | C         | 5                   | pp     | pp  | pp  | Pp  | Pp  | Pp  | Pp | Pp | Pp  | Pp  | Pp  | Pp  |
| HP     | C         | 13                  | Pp     | Pp  | Pp  | Pp  | PP  | PP  | PP | PP | PP  | PP  | PP  | PP  |
| SP     | CI        | 5                   | Pp     | Pp  | Pp  | Pp  | pp  | pp  | pp | pp | pp  | pp  | pp  | pp  |
| SP     | C         | 3                   | pp     | pp  | pp  | pp  | Pp  | Pp  | Pp | Pp | Pp  | Pp  | Pp  | Pp  |
| HP     | C         | 7                   | Pp     | Pp  | Pp  | Pp  | Pp  | PP  | PP | PP | PP  | PP  | PP  | PP  |
| SP     | CI        | 2                   | Pp     | Pp  | Pp  | Pp  | Pp  | pp  | pp | pp | pp  | pp  | pp  | pp  |
| HP     | C         | 30                  | PP     | PP  | PP  | PP  | PP  | PP  | PP | PP | PP  | PP  | PP  | Pp  |
| SP     | CI        | 8                   | pp     | pp  | pp  | pp  | pp  | pp  | pp | pp | pp  | pp  | pp  | Pp  |
| SP     | C         | 11                  | Pp     | Pp  | Pp  | Pp  | Pp  | Pp  | Pp | Pp | Pp  | Pp  | Pp  | pp  |
| HP     | C         | 27                  | PP     | PP  | PP  | PP  | PP  | PP  | PP | PP | PP  | PP  | PP  | Pp  |
| SP     | CI        | 7                   | pp     | pp  | pp  | pp  | pp  | pp  | pp | pp | pp  | pp  | pp  | Pp  |
| SP     | C         | 8                   | Pp     | Pp  | Pp  | Pp  | Pp  | Pp  | Pp | Pp | Pp  | Pp  | pp  | pp  |
| HP     | C         | 12                  | PP     | PP  | PP  | PP  | PP  | PP  | PP | PP | PP  | Pp  | Pp  | Pp  |
| SP     | CI        | 3                   | pp     | pp  | pp  | pp  | pp  | pp  | pp | pp | pp  | Pp  | Pp  | Pp  |
| SP     | C         | 3                   | Pp     | Pp  | Pp  | Pp  | Pp  | Pp  | Pp | Pp | Pp  | pp  | pp  | pp  |
| SP     | C         | 1                   | Pp     | Pp  | Pp  | Pp  | Pp  | Pp  | Pp | Pp | pp  | pp  | pp  | pp  |
| HP     | C         | 2,000               | PP     | PP  | PP  | PP  | PP  | PP  | PP | PP | Pp  | Pp  | Pp  | Pp  |

C, cross-compatible;

CI, cross-incompatible.

HP, homogeneous mapping population;

SP, BC<sub>1</sub>F<sub>1</sub> segregating population;

PP, represents the homozygous genotype identical to SDGa25;

pp, represents the homozygous genotype identical to B73 and J66;

Pp, represents the heterozygous genotype identical to the cross of SDGa25 with B73 or J66.

**Supplementary Table 2** The annotated genes and associated SNPs in the mapping region

| Gene ID        | Chr. | Physical position (AGP_V4) |               | SNP         | Allele | Position <sup>a</sup><br>(bp) | MAF  | P-value                 | Annotated function <sup>b</sup>                           |
|----------------|------|----------------------------|---------------|-------------|--------|-------------------------------|------|-------------------------|-----------------------------------------------------------|
|                |      | Start site (bp)            | End site (bp) |             |        |                               |      |                         |                                                           |
| Zm00001d048931 | 4    | 8,536,568                  | 8,538,453     | AX-90540670 | T/C    | 8,562,947                     | 0.26 | $1.03 \times 10^{-14}$  | Kinesin-like motor protein domain                         |
| Zm00001d048932 | 4    | 8,540,962                  | 8,542,901     | AX-90540670 | T/C    | 8,562,947                     | 0.26 | $1.03 \times 10^{-14}$  | TPL-binding domain in jasmonate signalling                |
| Zm00001d048936 | 4    | 9,618,917                  | 9,619,330     | AX-90540674 | C/G    | 9,619,399                     | 0.09 | $2.21 \times 10^{-112}$ | Pectinesterase family protein                             |
| Zm00001d048937 | 4    | 9,745,227                  | 9,747,622     | AX-90857882 | T/C    | 9,743,418                     | 0.20 | $3.64 \times 10^{-24}$  | Serine palmitoyltransferase                               |
| Zm00001d048939 | 4    | 9,751,743                  | 9,752,306     | AX-90857912 | T/C    | 9,751,133                     | 0.42 | $9.69 \times 10^{-28}$  | Uncharacterized protein                                   |
| Zm00001d048941 | 4    | 10,046,857                 | 10,048,318    | AX-90858003 | T/C    | 10,044,364                    | 0.22 | $1.34 \times 10^{-19}$  | Fidgetin-like protein 1                                   |
| Zm00001d048942 | 4    | 10,207,633                 | 10,208,412    | AX-90540684 | A/G    | 10,216,949                    | 0.22 | $3.11 \times 10^{-46}$  | TTF-type zinc finger protein with HAT dimerisation domain |
| Zm00001d048943 | 4    | 10,214,627                 | 10,217,849    | AX-90540684 | A/G    | 10,216,949                    | 0.22 | $3.11 \times 10^{-46}$  | Thioredoxin-like superfamily protein                      |

<sup>a</sup>Position in base pairs of the lead SNP based on B73 RefGen\_V4 sequence. <sup>b</sup>Homology searches against the GenBank of nonredundant protein database and the GenBank conserved domain database were conducted to annotate genes and their conserved domains in the mapped region. Chr., chromosome; MAF, minor allele frequency.

**Supplementary Table 3** Putative PME<sub>s</sub> identified in the secretome of SDGa25 and J66 pollen

| Pollen source | Fractions | Proteins  | Gene ID        | Score   | Coverage | PSM |
|---------------|-----------|-----------|----------------|---------|----------|-----|
| SDGa25        | Q6        | ZmPME10-1 | Zm00001d026422 | 547.27  | 40.37    | 202 |
|               |           | ZmGa1P    | Zm00001d048936 | 54.75   | 30.08    | 25  |
|               |           | ZmPME7-1  | Zm00001d022567 | 53.87   | 18.02    | 21  |
|               |           |           | Zm00001d044585 | 47.66   | 28.14    | 19  |
| SDGa25        | Q7        | ZmPME10-1 | Zm00001d026422 | 1138.04 | 51.93    | 444 |
|               |           | ZmGa1P    | Zm00001d048936 | 413.92  | 54.09    | 189 |
|               |           | ZmPME7-1  | Zm00001d022567 | 139.22  | 29.86    | 54  |
|               |           |           | Zm00001d044585 | 117.64  | 42.77    | 46  |
|               |           |           | Zm00001d014931 | 11.38   | 21.99    | 5   |
|               |           |           | Zm00001d047251 | 3.32    | 2.86     | 4   |
| SDGa25        | Q8        | ZmGa1P    | Zm00001d048936 | 902.56  | 53.83    | 338 |
|               |           | ZmPME10-1 | Zm00001d026422 | 472.63  | 33.10    | 150 |
|               |           | ZmPME7-1  | Zm00001d022567 | 46.46   | 10.95    | 15  |
|               |           |           | Zm00001d044585 | 14.74   | 19.46    | 7   |
|               |           |           | Zm00001d014931 | 9.09    | 20.57    | 3   |
| SDGa25        | Q9        | ZmGa1P    | Zm00001d048936 | 304.02  | 34.04    | 196 |
|               |           | ZmPME10-1 | Zm00001d026422 | 123.80  | 21.40    | 55  |
|               |           | ZmPME7-1  | Zm00001d022567 | 11.60   | 3.71     | 3   |
| SDGa25        | Q10       | ZmGa1P    | Zm00001d048936 | 260.62  | 37.47    | 168 |
|               |           | ZmPME10-1 | Zm00001d026422 | 53.21   | 11.55    | 18  |
|               |           |           | Zm00001d014931 | 6.74    | 7.80     | 3   |
| J66           | Q6        | ZmPME10-1 | Zm00001d026422 | 735.83  | 47.50    | 291 |
|               |           | ZmPME7-1  | Zm00001d022567 | 172.52  | 27.21    | 64  |
|               |           |           | Zm00001d044585 | 76.40   | 43.93    | 30  |
|               |           |           | Zm00001d002124 | 39.78   | 12.53    | 18  |
| J66           | Q7        | ZmPME10-1 | Zm00001d026422 | 1069.78 | 51.50    | 416 |
|               |           | ZmPME7-1  | Zm00001d022567 | 144.34  | 28.62    | 59  |
|               |           |           | Zm00001d044585 | 108.19  | 48.27    | 42  |
|               |           |           | Zm00001d047251 | 3.80    | 2.86     | 4   |
| J66           | Q8        | ZmPME10-1 | Zm00001d026422 | 1281.76 | 50.64    | 556 |
|               |           | ZmPME7-1  | Zm00001d022567 | 178.25  | 31.45    | 78  |
|               |           |           | Zm00001d002124 | 62.16   | 10.15    | 33  |
|               |           |           | Zm00001d044585 | 40.55   | 25.45    | 19  |
|               |           |           | Zm00001d014931 | 18.13   | 32.62    | 8   |
|               |           |           | Zm00001d047251 | 3.46    | 2.86     | 4   |
| J66           | Q9        | ZmPME10-1 | Zm00001d026422 | 484.62  | 33.95    | 171 |
|               |           | ZmPME7-1  | Zm00001d022567 | 91.41   | 22.79    | 37  |
|               |           |           | Zm00001d044585 | 33.82   | 30.35    | 14  |
|               |           |           | Zm00001d014931 | 24.96   | 39.72    | 12  |
| J66           | Q10       | ZmPME10-1 | Zm00001d026422 | 201.20  | 29.67    | 77  |
|               |           | ZmPME7-1  | Zm00001d022567 | 30.00   | 8.30     | 11  |
|               |           |           | Zm00001d044585 | 17.68   | 11.98    | 7   |
|               |           |           | Zm00001d014931 | 9.80    | 17.02    | 4   |



**Supplementary Table 4** Polymorphic markers used for mapping *ZmGa1P*

| Primer |         | Primer sequence (5'-3') | Primer position (bp) | Polymorphism in inbred lines |
|--------|---------|-------------------------|----------------------|------------------------------|
| M14    | Forward | GCATGGTTTGCAGGTTCTTG    | 8102193-8102212      | SDGa25 with B73 and J66      |
|        | Reverse | CATCTGTGCCTTCACTCCAG    | 8102343-8102323      |                              |
| M13    | Forward | TGTGTGACTCCTTGCTCATG    | 8233435-8233454      | SDGa25 with B73 and J66      |
|        | Reverse | TCCCTTTCCTCTCTTTTCTTTCT | 8233659-8233637      |                              |
| M33    | Forward | CCGTCCTGGTGGGTGGTAC     | 8337822-8337840      | SDGa25 with B73 and J66      |
|        | Reverse | GATATAATGGAGGACAGGGAGC  | 8337920-8337899      |                              |
| M61    | Forward | CGCCTGTGATCTACTCCTACAC  | 8615352-8615373      | SDGa25 with B73 and J66      |
|        | Reverse | CCGGCCCTCTATATAGACAGAG  | 8616398-8616377      |                              |
| M1     | Forward | TTGGCCCATGTCTTCTCA      | 9958473-9958456      | SDGa25 with B73 and J66      |
|        | Reverse | ATCTATCGCACAAAGCCCTAA   | 9964029-9964048      |                              |
| M4     | Forward | CCCCTATGATAGAAATGTAGCAC | 10215582-10215604    | SDGa25 with B73 and J66      |
|        | Reverse | CCCACTTGATGTCACCACC     | 10216278-10216260    |                              |
| M26    | Forward | GTGCATGGCTCTGGTTAC      | 10470646-10470663    | SDGa25 with J66              |
|        | Reverse | CCTTGACTACGCCTGAAA      | 10471347-10471330    |                              |
| M10    | Forward | GGCTTAACTGTAGCCATGCATG  | 10471346-10471367    | SDGa25 with B73              |
|        | Reverse | TGAAGAGCTTCGCATGGAGTG   | 10471986-10471966    |                              |
| M11    | Forward | AGCGATGCGGTTTAGATG      | 10487937-10487954    | SDGa25 with B73 and J66      |
|        | Reverse | GCGCCAATAAATGAAGGAT     | 10488426-10488408    |                              |

The primer physical position on chromosome 4 is based on the B73 RefGen\_V4 sequence released in maizeGDB.

**Supplementary Table 5** SNP markers used for mapping *ZmGa1P*

| SNP | SNP position (bp)         | Sequences (50 bp upstream and downstream of the SNP)                                                        |
|-----|---------------------------|-------------------------------------------------------------------------------------------------------------|
| M44 | 8445929 [SDGa25/B73/J66]  | AGACCAACAGCTTGGATGGCGACTGCATTTTCATCAGCCCCTGCAGCAGC[G/A/A]ATTCATTCTGTGCATGTCCGTATGACGGAGTCGAAGATGATCTTATCTAC |
| M53 | 8537889 [SDGa25/B73/J66]  | RGTTTGATACTATTAATCTGTGAGTAAAACGTTGCACATTCTACTAWGTA[G/A/A]TAAAAGCTCATGACATAGTGAACCATCTTGTTGTTTTGCAGAYGCAACA  |
| M16 | 10265399 [SDGa25/J66]     | TTGACTCGCCCCGAGGCTAGCCTCTGGTGGGAAGCGCATTTCGATTACCC[C/T]GAGGGCGTCTCGTGCGATTCTCCGGGAGCTACCCGCCTCGGCCAACCCT    |
| M18 | 10265470 [SDGa25/B73]     | TCCGGGAGCTACCCGCCTCGGCCAACCCTCCGATACAAGAACGTGTGTC[T/C]GTACGTCCACCTGCCCCGCTGAGGGTGCAAAAGTCAACAAAGGACAACAC    |
| M89 | 10379103 [SDGa25/B73/J66] | TCCCTAATATTTATATAAATGTTGCAGGGTCTGTGGAGCTTTGATTTGC[T/A/A]TTAGCTCATTTTTTATCTAATCTTCAARATCAATCAGAATCATAGTCAGG  |

The SNP physical position on chromosome 4 is based on the B73 RefGen\_V4 sequence released in maizeGDB. SNPs between SDGa25 and B73 or J66 are indicated by R, W, and Y. R, A/G; W, A/T; Y, C/T.

**Supplementary Table 6** Primers used in this study

| Primers                    | Primer sequence (5'-3')                                              | Experimental purpose             |
|----------------------------|----------------------------------------------------------------------|----------------------------------|
| Zm00001d048931             | Forward GCTGCATTAGCGCCCTTG<br>Reverse CTGGTTGGTCCAGAACCTCC           |                                  |
| Zm00001d048932             | Forward GCATCAAGAAACAGTGGAACAGG<br>Reverse TTAGTGTGCCCTCCACCCTC      |                                  |
| Zm00001d048936<br>( copy1) | Forward GGTTACACGACCATTAGCGAG<br>Reverse GAATGGCTTGCTTCTACCGAG       |                                  |
| Zm00001d048936<br>( copy2) | Forward TGTTCCGCGAGAAGCTGTTAC<br>Reverse CCCACATCCACTCACCGAAG        |                                  |
| Zm00001d048937             | Forward GTATTTGATGCCCAAGGTCCG<br>Reverse TGCGTTTCCTGCGACACCTC        | Real-time PCR                    |
| Zm00001d048939             | Forward GAACGGGTGGGTAGGAGGAG<br>Reverse CAGCAACGACACCGAGCAG          |                                  |
| Zm00001d048941             | Forward GGTGGTGAACGAAGATGTC<br>Reverse CTTGACCCCGGGCTCTAC            |                                  |
| Zm00001d048942             | Forward CATTGTTTGCCGGTGGTG<br>Reverse TATTTGGCCTGCGCTTCC             |                                  |
| Zm00001d048943             | Forward GCCACGGTGCTGGAGTTC<br>Reverse CGTCAGCGAGCACGAAAC             |                                  |
| Zm00001d026422             | Forward GGCCAACATCTTCATGTACGG<br>Reverse CCCATCGACTTGCAGATGAAC       |                                  |
| ZmGa1P-BAC                 | Forward CAAGGAGGAAGGGAGGAATAAG<br>Reverse GGTGCTCCTAGCATATATGACTC    | BAC scanning                     |
| ZmGa1P-SDGa25              | Forward ATGATGATGAGTAAACAAATGCTCG<br>Reverse TTATTCTTCAGCGGGTGGTAGG  | <i>ZmGa1P</i> Cloning            |
| ZmGa1P-Del                 | Forward GATGGAAGCAGTACCATGGC<br>Reverse GAGACATCCCAGGCCCGTAAC        | <i>ZmGa1P</i> deletion detection |
| ZmPME10-1-Nluc             | Forward GACGACAACGATGGCAACATG<br>Reverse TTACCCTTTGGTGAATCCCATG      | Luciferase complementation       |
| CLuc-ZmPME10-1             | Forward GACGACAACGATGGCAACATG<br>Reverse TTACCCTTTGGTGAATCCCATG      |                                  |
| Cluc-ZmGa1P                | Forward ATGAAAAAGGTCTTTTTCAACTTATGGG<br>Reverse TTCTTCAGCGGGTGGTAGGG |                                  |
| ZmGa1P-T                   | Forward ACCTGAAGATGGCGTTACAC<br>Reverse CTCAAGCTGCTCTAGCATTCCG       | Transgenic identification        |
